# Supplementary material for: An enigma: A meta-analysis reveals the effect of ubiquitous microplastics on different taxa in aquatic systems
Source: Frontiers journal article supplement (doi:10.3389/fenvs.2022.999349), 2022-09-19
Supplement: Data_Sheet_2.docx [file Data_Sheet_2.docx]

**Table S1:** Modified Preferred Reporting Items for Systematic Reviews and Meta‐Analysis (PRISMA) indicating the number of studies considered at each step of the literature search.

**Eligibility**

**Included**

**Identification**

**Screening**

Records identified through database searching

**(N= 958)**

additional records identified through other sources

**(N = 10)**

945 of records after duplicates removed

255 of records screened

690 excluded

72 of full-text articles assessed for eligibility

Missing data

**N = 8**

Studies included in quantitative synthesis (meta-analysis)

**N = 72**

Experimental design

**N = 100**

No effect measurements

**N = 59**

**Papers included in Metanalysis**

Au, S. Y., Bruce, T. F., Bridges, W. C., and Klaine, S. J. (2015). Responses of *Hyalella azteca* to acute and chronic microplastic exposures: Effects of Microplastic Exposure on *Hyalella azteca*. *Environ. Toxicol. Chem.* 34, 2564–2572. doi: 10.1002/etc.3093.

Avio, C. G., Gorbi, S., Milan, M., Benedetti, M., Fattorini, D., d’Errico, G., et al. (2015). Pollutants bioavailability and toxicological risk from microplastics to marine mussels. *Environ. Pollut.* 198, 211–222. doi: 10.1016/j.envpol.2014.12.021.

Ayukai, T. (1987). Discriminate feeding of the calanoid copepod A cartia clausi in mixtures of phytoplankton and inert particles. *Mar. Biol.* 94, 579–587.

Beckingham, B., and Ghosh, U. (2017). Differential bioavailability of polychlorinated biphenyls associated with environmental particles: Microplastic in comparison to wood, coal and biochar. *Environ. Pollut.* 220, 150–158. doi: 10.1016/j.envpol.2016.09.033.

Beiras, R., Bellas, J., Cachot, J., Cormier, B., Cousin, X., Engwall, M., et al. (2018). Ingestion and contact with polyethylene microplastics does not cause acute toxicity on marine zooplankton. *J. Hazard. Mater.* 360, 452–460. doi: 10.1016/j.jhazmat.2018.07.101.

Bergami, E., Bocci, E., Vannuccini, M. L., Monopoli, M., Salvati, A., Dawson, K. A., et al. (2016). Nano-sized polystyrene affects feeding, behavior and physiology of brine shrimp Artemia franciscana larvae. *Ecotoxicol. Environ. Saf.* 123, 18–25. doi: 10.1016/j.ecoenv.2015.09.021.

Besseling, E., Wang, B., Lürling, M., and Koelmans, A. A. (2014). Nanoplastic Affects Growth of *S. obliquus* and Reproduction of *D. magna*. *Environ. Sci. Technol.* 48, 12336–12343. doi: 10.1021/es503001d.

Besseling, E., Wegner, A., Foekema, E. M., van den Heuvel-Greve, M. J., and Koelmans, A. A. (2013). Effects of Microplastic on Fitness and PCB Bioaccumulation by the Lugworm *Arenicola marina* (L.). *Environ. Sci. Technol.* 47, 593–600. doi: 10.1021/es302763x.

Blarer, P., and Burkhardt-Holm, P. (2016). Microplastics affect assimilation efficiency in the freshwater amphipod Gammarus fossarum. *Environ. Sci. Pollut. Res.* 23, 23522–23532. doi: 10.1007/s11356-016-7584-2.

Booth, A. M., Hansen, B. H., Frenzel, M., Johnsen, H., and Altin, D. (2016). Uptake and toxicity of methylmethacrylate-based nanoplastic particles in aquatic organisms. *Environ. Toxicol. Chem.* 35, 1641–1649. doi: 10.1002/etc.3076.

Browne, M. A., Niven, S. J., Galloway, T. S., Rowland, S. J., and Thompson, R. C. (2013). Microplastic Moves Pollutants and Additives to Worms, Reducing Functions Linked to Health and Biodiversity. *Curr. Biol.* 23, 2388–2392. doi: 10.1016/j.cub.2013.10.012.

Cole, M., and Galloway, T. S. (2015). Ingestion of Nanoplastics and Microplastics by Pacific Oyster Larvae. *Environ. Sci. Technol.* 49, 14625–14632. doi: 10.1021/acs.est.5b04099.

Cole, M., Lindeque, P., Fileman, E., Halsband, C., and Galloway, T. S. (2015). The Impact of Polystyrene Microplastics on Feeding, Function and Fecundity in the Marine Copepod *Calanus helgolandicus*. *Environ. Sci. Technol.* 49, 1130–1137. doi: 10.1021/es504525u.

Cole, M., Lindeque, P., Fileman, E., Halsband, C., Goodhead, R., Moger, J., et al. (2013). Microplastic Ingestion by Zooplankton. *Environ. Sci. Technol.* 47, 6646–6655. doi: 10.1021/es400663f.

Cong, Y., Jin, F., Tian, M., Wang, J., Shi, H., Wang, Y., et al. (2019). Ingestion, egestion and post-exposure effects of polystyrene microspheres on marine medaka (Oryzias melastigma). *Chemosphere* 228, 93–100. doi: 10.1016/j.chemosphere.2019.04.098.

Cunningham, E. M., Cuthbert, R. N., Coughlan, N. E., Kregting, L., Cairnduff, V., and Dick, J. T. A. (2021). Microplastics do not affect the feeding rates of a marine predator. *Sci. Total Environ.* 779, 146487. doi: 10.1016/j.scitotenv.2021.146487.

Cuthbert, R. N., Al-Jaibachi, R., Dalu, T., Dick, J. T. A., and Callaghan, A. (2019). The influence of microplastics on trophic interaction strengths and oviposition preferences of dipterans. *Sci. Total Environ.* 651, 2420–2423. doi: 10.1016/j.scitotenv.2018.10.108.

Davies, H. L., Robb, H., Cox, K. D., Covernton, G. A., Eastham, T. M., Alexander, H. J., et al. (2021). A preliminary analysis of ingestion and egestion of microplastic fibres in the acorn barnacle Balanus glandula. *J. Exp. Mar. Biol. Ecol.* 542–543, 151589. doi: 10.1016/j.jembe.2021.151589.

de Sá, L. C., Luís, L. G., and Guilhermino, L. (2015). Effects of microplastics on juveniles of the common goby (Pomatoschistus microps): Confusion with prey, reduction of the predatory performance and efficiency, and possible influence of developmental conditions. *Environ. Pollut.* 196, 359–362. doi: 10.1016/j.envpol.2014.10.026.

Della Torre, C., Bergami, E., Salvati, A., Faleri, C., Cirino, P., Dawson, K. A., et al. (2014). Accumulation and Embryotoxicity of Polystyrene Nanoparticles at Early Stage of Development of Sea Urchin Embryos *Paracentrotus lividus*. *Environ. Sci. Technol.* 48, 12302–12311. doi: 10.1021/es502569w.

Ferreira, P., Fonte, E., Soares, M. E., Carvalho, F., and Guilhermino, L. (2016). Effects of multi-stressors on juveniles of the marine fish Pomatoschistus microps: Gold nanoparticles, microplastics and temperature. *Aquat. Toxicol.* 170, 89–103. doi: 10.1016/j.aquatox.2015.11.011.

Fonte, E., Ferreira, P., and Guilhermino, L. (2016). Temperature rise and microplastics interact with the toxicity of the antibiotic cefalexin to juveniles of the common goby ( Pomatoschistus microps ): Post-exposure predatory behaviour, acetylcholinesterase activity and lipid peroxidation. *Aquat. Toxicol.* 180, 173–185. doi: 10.1016/j.aquatox.2016.09.015.

Green, D. S. (2016). Effects of microplastics on European flat oysters, Ostrea edulis and their associated benthic communities. *Environ. Pollut.* 216, 95–103. doi: 10.1016/j.envpol.2016.05.043.

Green, D. S., Boots, B., Sigwart, J., Jiang, S., and Rocha, C. (2016). Effects of conventional and biodegradable microplastics on a marine ecosystem engineer (Arenicola marina) and sediment nutrient cycling. *Environ. Pollut.* 208, 426–434. doi: 10.1016/j.envpol.2015.10.010.

Guilhermino, L., Martins, A., Cunha, S., and Fernandes, J. O. (2021). Long-term adverse effects of microplastics on Daphnia magna reproduction and population growth rate at increased water temperature and light intensity: Combined effects of stressors and interactions. *Sci. Total Environ.* 784, 147082. doi: 10.1016/j.scitotenv.2021.147082.

Guven, O., Bach, L., Munk, P., Dinh, K. V., Mariani, P., and Nielsen, T. G. (2018). Microplastic does not magnify the acute effect of PAH pyrene on predatory performance of a tropical fish (Lates calcarifer). *Aquat. Toxicol.* 198, 287–293. doi: 10.1016/j.aquatox.2018.03.011.

Hämer, J., Gutow, L., Köhler, A., and Saborowski, R. (2014). Fate of Microplastics in the Marine Isopod *Idotea emarginata*. *Environ. Sci. Technol.* 48, 13451–13458. doi: 10.1021/es501385y.

Hu, L., Chernick, M., Lewis, A. M., Ferguson, P. L., and Hinton, D. E. (2020). Chronic microfiber exposure in adult Japanese medaka (Oryzias latipes). *PLOS ONE* 15, e0229962. doi: 10.1371/journal.pone.0229962.

Imhof, H. K., and Laforsch, C. (2016). Hazardous or not – Are adult and juvenile individuals of Potamopyrgus antipodarum affected by non-buoyant microplastic particles? *Environ. Pollut.* 218, 383–391. doi: 10.1016/j.envpol.2016.07.017.

Jemec, A., Horvat, P., Kunej, U., Bele, M., and Kržan, A. (2016). Uptake and effects of microplastic textile fibers on freshwater crustacean Daphnia magna. *Environ. Pollut.* 219, 201–209. doi: 10.1016/j.envpol.2016.10.037.

Jeong, C.-B., Won, E.-J., Kang, H.-M., Lee, M.-C., Hwang, D.-S., Hwang, U.-K., et al. (2016). Microplastic Size-Dependent Toxicity, Oxidative Stress Induction, and p-JNK and p-p38 Activation in the Monogonont Rotifer ( *Brachionus koreanus* ). *Environ. Sci. Technol.* 50, 8849–8857. doi: 10.1021/acs.est.6b01441.

Kaposi, K. L., Mos, B., Kelaher, B. P., and Dworjanyn, S. A. (2014). Ingestion of Microplastic Has Limited Impact on a Marine Larva. *Environ. Sci. Technol.* 48, 1638–1645. doi: 10.1021/es404295e.

Khosrovyan, A., Gabrielyan, B., and Kahru, A. (2020). Ingestion and effects of virgin polyamide microplastics on Chironomus riparius adult larvae and adult zebrafish Danio rerio. *Chemosphere* 259, 127456. doi: 10.1016/j.chemosphere.2020.127456.

Lei, L., Wu, S., Lu, S., Liu, M., Song, Y., Fu, Z., et al. (2018). Microplastic particles cause intestinal damage and other adverse effects in zebrafish Danio rerio and nematode Caenorhabditis elegans. *Sci. Total Environ.* 619–620, 1–8. doi: 10.1016/j.scitotenv.2017.11.103.

LeMoine, C. M. R., Kelleher, B. M., Lagarde, R., Northam, C., Elebute, O. O., and Cassone, B. J. (2018). Transcriptional effects of polyethylene microplastics ingestion in developing zebrafish (Danio rerio). *Environ. Pollut.* 243, 591–600. doi: 10.1016/j.envpol.2018.08.084.

Li, Y., Wang, J., Yang, G., Lu, L., Zheng, Y., Zhang, Q., et al. (2020). Low level of polystyrene microplastics decreases early developmental toxicity of phenanthrene on marine medaka (Oryzias melastigma). *J. Hazard. Mater.* 385, 121586. doi: 10.1016/j.jhazmat.2019.121586.

Lo, H. K. A., and Chan, K. Y. K. (2018). Negative effects of microplastic exposure on growth and development of Crepidula onyx. *Environ. Pollut.* 233, 588–595. doi: 10.1016/j.envpol.2017.10.095.

Luís, L. G., Ferreira, P., Fonte, E., Oliveira, M., and Guilhermino, L. (2015). Does the presence of microplastics influence the acute toxicity of chromium(VI) to early juveniles of the common goby (Pomatoschistus microps)? A study with juveniles from two wild estuarine populations. *Aquat. Toxicol.* 164, 163–174. doi: 10.1016/j.aquatox.2015.04.018.

Ma, Y., Huang, A., Cao, S., Sun, F., Wang, L., Guo, H., et al. (2016). Effects of nanoplastics and microplastics on toxicity, bioaccumulation, and environmental fate of phenanthrene in fresh water. *Environ. Pollut.* 219, 166–173. doi: 10.1016/j.envpol.2016.10.061.

Malafaia, G., de Souza, A. M., Pereira, A. C., Gonçalves, S., da Costa Araújo, A. P., Ribeiro, R. X., et al. (2020). Developmental toxicity in zebrafish exposed to polyethylene microplastics under static and semi-static aquatic systems. *Sci. Total Environ.* 700, 134867. doi: 10.1016/j.scitotenv.2019.134867.

Malinich, T. D., Chou, N., Sepúlveda, M. S., and Höök, T. O. (2018). No evidence of microplastic impacts on consumption or growth of larval Pimephales promelas. *Environ. Toxicol. Chem.* 37, 2912–2918. doi: 10.1002/etc.4257.

Mazurais, D., Ernande, B., Quazuguel, P., Severe, A., Huelvan, C., Madec, L., et al. (2015). Evaluation of the impact of polyethylene microbeads ingestion in European sea bass (Dicentrarchus labrax) larvae. *Mar. Environ. Res.* 112, 78–85. doi: 10.1016/j.marenvres.2015.09.009.

Nobre, C. R., Santana, M. F. M., Maluf, A., Cortez, F. S., Cesar, A., Pereira, C. D. S., et al. (2015). Assessment of microplastic toxicity to embryonic development of the sea urchin Lytechinus variegatus (Echinodermata: Echinoidea). *Mar. Pollut. Bull.* 92, 99–104. doi: 10.1016/j.marpolbul.2014.12.050.

Ogonowski, M., Schür, C., Jarsén, Å., and Gorokhova, E. (2016). The Effects of Natural and Anthropogenic Microparticles on Individual Fitness in Daphnia magna. *PLOS ONE* 11, e0155063. doi: 10.1371/journal.pone.0155063.

Pedà, C., Caccamo, L., Fossi, M. C., Gai, F., Andaloro, F., Genovese, L., et al. (2016). Intestinal alterations in European sea bass Dicentrarchus labrax (Linnaeus, 1758) exposed to microplastics: Preliminary results. *Environ. Pollut.* 212, 251–256. doi: 10.1016/j.envpol.2016.01.083.

Redondo-Hasselerharm, P. E., Falahudin, D., Peeters, E. T. H. M., and Koelmans, A. A. (2018). Microplastic Effect Thresholds for Freshwater Benthic Macroinvertebrates. *Environ. Sci. Technol.* 52, 2278–2286. doi: 10.1021/acs.est.7b05367.

Rehse, S., Kloas, W., and Zarfl, C. (2016). Short-term exposure with high concentrations of pristine microplastic particles leads to immobilisation of Daphnia magna. *Chemosphere* 153, 91–99. doi: 10.1016/j.chemosphere.2016.02.133.

Rist, S. E., Assidqi, K., Zamani, N. P., Appel, D., Perschke, M., Huhn, M., et al. (2016). Suspended micro-sized PVC particles impair the performance and decrease survival in the Asian green mussel Perna viridis. *Mar. Pollut. Bull.* 111, 213–220. doi: 10.1016/j.marpolbul.2016.07.006.

Romero-Blanco, A., Remón-Elola, A., and Alonso, Á. (2021). Assessment of the Effects of Environmental Concentrations of Microplastics on the Aquatic Snail Potamopyrgus antipodarum. *Water. Air. Soil Pollut.* 232, 438. doi: 10.1007/s11270-021-05379-7.

Rummel, C. D., Löder, M. G. J., Fricke, N. F., Lang, T., Griebeler, E.-M., Janke, M., et al. (2016). Plastic ingestion by pelagic and demersal fish from the North Sea and Baltic Sea. *Mar. Pollut. Bull.* 102, 134–141. doi: 10.1016/j.marpolbul.2015.11.043.

Schöpfer, L., Menzel, R., Schnepf, U., Ruess, L., Marhan, S., Brümmer, F., et al. (2020). Microplastics Effects on Reproduction and Body Length of the Soil-Dwelling Nematode Caenorhabditis elegans. *Front. Environ. Sci.* 8. Available at: https://www.frontiersin.org/articles/10.3389/fenvs.2020.00041 [Accessed July 7, 2022].

Shang, X., Lu, J., Feng, C., Ying, Y., He, Y., Fang, S., et al. (2020). Microplastic (1 and 5 μm) exposure disturbs lifespan and intestine function in the nematode Caenorhabditis elegans. *Sci. Total Environ.* 705, 135837. doi: 10.1016/j.scitotenv.2019.135837.

Silva, C. J. M., Silva, A. L. P., Gravato, C., and Pestana, J. L. T. (2019). Ingestion of small-sized and irregularly shaped polyethylene microplastics affect Chironomus riparius life-history traits. *Sci. Total Environ.* 672, 862–868. doi: 10.1016/j.scitotenv.2019.04.017.

Stanković, J., Milošević, D., Savić-Zdraković, D., Yalçın, G., Yildiz, D., Beklioğlu, M., et al. (2020). Exposure to a microplastic mixture is altering the life traits and is causing deformities in the non-biting midge Chironomus riparius Meigen (1804). *Environ. Pollut.* 262, 114248. doi: 10.1016/j.envpol.2020.114248.

Sun, Y., Xu, W., Gu, Q., Chen, Y., Zhou, Q., Zhang, L., et al. (2019). Small-Sized Microplastics Negatively Affect Rotifers: Changes in the Key Life-History Traits and Rotifer–Phaeocystis Population Dynamics. *Environ. Sci. Technol.* 53, 9241–9251. doi: 10.1021/acs.est.9b02893.

Sussarellu, R., Suquet, M., Thomas, Y., Lambert, C., Fabioux, C., Pernet, M. E. J., et al. (2016). Oyster reproduction is affected by exposure to polystyrene microplastics. *Proc. Natl. Acad. Sci.* 113, 2430–2435. doi: 10.1073/pnas.1519019113.

Tallec, K., Huvet, A., Di Poi, C., González-Fernández, C., Lambert, C., Petton, B., et al. (2018). Nanoplastics impaired oyster free living stages, gametes and embryos. *Environ. Pollut.* 242, 1226–1235. doi: 10.1016/j.envpol.2018.08.020.

Tongo, I., and Erhunmwunse, N. O. (2022). Effects of ingestion of polyethylene microplastics on survival rate, opercular respiration rate and swimming performance of African catfish (Clarias gariepinus). *J. Hazard. Mater.* 423, 127237. doi: 10.1016/j.jhazmat.2021.127237.

Tosetto, L., Brown, C., and Williamson, J. E. (2016). Microplastics on beaches: ingestion and behavioural consequences for beachhoppers. *Mar. Biol.* 163, 199. doi: 10.1007/s00227-016-2973-0.

Ugolini, A., Ungherese, G., Ciofini, M., Lapucci, A., and Camaiti, M. (2013). Microplastic debris in sandhoppers. *Estuar. Coast. Shelf Sci.* 129, 19–22. doi: 10.1016/j.ecss.2013.05.026.

Van Cauwenberghe, L., Devriese, L., Galgani, F., Robbens, J., and Janssen, C. R. (2015). Microplastics in sediments: A review of techniques, occurrence and effects. *Mar. Environ. Res.* 111, 5–17. doi: 10.1016/j.marenvres.2015.06.007.

Wang, J., Li, Y., Lu, L., Zheng, M., Zhang, X., Tian, H., et al. (2019). Polystyrene microplastics cause tissue damages, sex-specific reproductive disruption and transgenerational effects in marine medaka (Oryzias melastigma). *Environ. Pollut.* 254, 113024. doi: 10.1016/j.envpol.2019.113024.

Watts, A. J. R., Urbina, M. A., Goodhead, R., Moger, J., Lewis, C., and Galloway, T. S. (2016). Effect of Microplastic on the Gills of the Shore Crab *Carcinus maenas*. *Environ. Sci. Technol.* 50, 5364–5369. doi: 10.1021/acs.est.6b01187.

Weber, A., von Randow, M., Voigt, A.-L., von der Au, M., Fischer, E., Meermann, B., et al. (2021). Ingestion and toxicity of microplastics in the freshwater gastropod Lymnaea stagnalis: No microplastic-induced effects alone or in combination with copper. *Chemosphere* 263, 128040. doi: 10.1016/j.chemosphere.2020.128040.

Wegner, A., Besseling, E., Foekema, E. M., Kamermans, P., and Koelmans, A. A. (2012). Effects of nanopolystyrene on the feeding behavior of the blue mussel ( *Mytilus edulis* L.). *Environ. Toxicol. Chem.* 31, 2490–2497. doi: 10.1002/etc.1984.

Welden, N. A. C., and Cowie, P. R. (2016). Long-term microplastic retention causes reduced body condition in the langoustine, Nephrops norvegicus. *Environ. Pollut.* 218, 895–900. doi: 10.1016/j.envpol.2016.08.020.

Wen, B., Jin, S.-R., Chen, Z.-Z., Gao, J.-Z., Liu, Y.-N., Liu, J.-H., et al. (2018). Single and combined effects of microplastics and cadmium on the cadmium accumulation, antioxidant defence and innate immunity of the discus fish (Symphysodon aequifasciatus). *Environ. Pollut.* 243, 462–471. doi: 10.1016/j.envpol.2018.09.029.

Wright, S. L., Rowe, D., Thompson, R. C., and Galloway, T. S. (2013). Microplastic ingestion decreases energy reserves in marine worms. *Curr. Biol.* 23, R1031–R1033. doi: 10.1016/j.cub.2013.10.068.

Xia, X., Sun, M., Zhou, M., Chang, Z., and Li, L. (2020). Polyvinyl chloride microplastics induce growth inhibition and oxidative stress in Cyprinus carpio var. larvae. *Sci. Total Environ.* 716, 136479. doi: 10.1016/j.scitotenv.2019.136479.

Yin, L., Chen, B., Xia, B., Shi, X., and Qu, K. (2018). Polystyrene microplastics alter the behavior, energy reserve and nutritional composition of marine jacopever (Sebastes schlegelii). *J. Hazard. Mater.* 360, 97–105. doi: 10.1016/j.jhazmat.2018.07.110.

Zheng, J.-L., Wang, D., Chen, X., Song, H.-Z., Xiang, L.-P., Yu, H.-X., et al. (2022). Nutritional-status dependent effects of microplastics on activity and expression of alkaline phosphatase and alpha-amylase in Brachionus rotundiformis. *Sci. Total Environ.* 806, 150213. doi: 10.1016/j.scitotenv.2021.150213.

Ziajahromi, S., Kumar, A., Neale, P. A., and Leusch, F. D. L. (2018). Environmentally relevant concentrations of polyethylene microplastics negatively impact the survival, growth and emergence of sediment-dwelling invertebrates. *Environ. Pollut.* 236, 425–431. doi: 10.1016/j.envpol.2018.01.094.
